# Supplementary material
Source: PubMed Central journal article supplement (PMC9847505)
Supplement: NEJMc2213948_disclosures.pdf [file NEJMc2213948_disclosures.pdf]

**Discloser Identifier:** 1007991

**Disclosure Purpose:** 222-13948

## Summary of Interests

I do not have any interests to disclose at this time.

## Additional Questions

1. **Are there other relationships or activities that readers could perceive to have influenced, or that give the appearance of potentially influencing, what you wrote in the submitted work?**

No.

2. **What is the manuscript title?**

Immunogenicity of the BA.5 Bivalent mRNA Vaccine Boosters

3. **Are you the corresponding author?**

No.

## Certification

I certify that the information provided in this disclosure is complete and accurate.

Discloser Identifier: 338296

Disclosure Purpose: 222-13948

## Summary of Interests

### Company or Organization

| Entity                                                                                                                         | Type             | Interest Held By                                                                |
|--------------------------------------------------------------------------------------------------------------------------------|------------------|---------------------------------------------------------------------------------|
| Alkermes, Inc.                                                                                                                 | Grant / Contract | Self                                                                            |
| <i>Recipient Name:</i> Dan Barouch<br><i>Grant / Contract Description:</i> contract research<br><i>Additional Information:</i> |                  | <i>Recipient Type:</i> Institution<br><i>Grant / Contract Purpose:</i> Research |
| Avidia                                                                                                                         | Consultant       | Self                                                                            |
| <i>Category:</i> Consultant<br><i>Description:</i><br><i>Additional Information:</i>                                           |                  |                                                                                 |
| BARDA                                                                                                                          | Grant / Contract | Self                                                                            |
| <i>Recipient Name:</i> Dan Barouch<br><i>Grant / Contract Description:</i> contract research<br><i>Additional Information:</i> |                  | <i>Recipient Type:</i> Institution<br><i>Grant / Contract Purpose:</i> Research |
| Bill and Melinda Gates Foundation                                                                                              | Grant / Contract | Self                                                                            |
| <i>Recipient Name:</i> Dan Barouch<br><i>Grant / Contract Description:</i> academic research<br><i>Additional Information:</i> |                  | <i>Recipient Type:</i> Institution<br><i>Grant / Contract Purpose:</i> Research |
| Celsion                                                                                                                        | Consultant       | Self                                                                            |
| <i>Category:</i> Consultant<br><i>Description:</i> consultant<br><i>Additional Information:</i>                                |                  |                                                                                 |
| CureVac                                                                                                                        | Grant / Contract | Self                                                                            |
| <i>Recipient Name:</i> Dan Barouch<br><i>Grant / Contract Description:</i> contract research<br><i>Additional Information:</i> |                  | <i>Recipient Type:</i> Institution<br><i>Grant / Contract Purpose:</i> Research |
| DARPA                                                                                                                          | Grant / Contract | Self                                                                            |
| <i>Recipient Name:</i> Dan Barouch<br><i>Grant / Contract Description:</i> academic research<br><i>Additional Information:</i> |                  | <i>Recipient Type:</i> Institution<br><i>Grant / Contract Purpose:</i> Research |
| Gilead Sciences                                                                                                                | Grant / Contract | Self                                                                            |
| <i>Recipient Name:</i> Dan Barouch<br><i>Grant / Contract Description:</i> contract research<br><i>Additional Information:</i> |                  | <i>Recipient Type:</i> Institution<br><i>Grant / Contract Purpose:</i> Research |

| Entity                                                                                                                         | Type             | Interest Held By |
|--------------------------------------------------------------------------------------------------------------------------------|------------------|------------------|
| Henry Jackson Foundation                                                                                                       | Grant / Contract | Self             |
| <i>Recipient Name:</i> Dan Barouch<br><i>Grant / Contract Description:</i> academic research<br><i>Additional Information:</i> |                  |                  |
| <i>Recipient Type:</i> Institution<br><i>Grant / Contract Purpose:</i> Research                                                |                  |                  |
| Intima Biosciences                                                                                                             | Grant / Contract | Self             |
| <i>Recipient Name:</i> Dan Barouch<br><i>Grant / Contract Description:</i> contract research<br><i>Additional Information:</i> |                  |                  |
| <i>Recipient Type:</i> Institution<br><i>Grant / Contract Purpose:</i> Research                                                |                  |                  |
| Janssen Research and Development                                                                                               | Grant / Contract | Self             |
| <i>Recipient Name:</i> Dan Barouch<br><i>Grant / Contract Description:</i> contract research<br><i>Additional Information:</i> |                  |                  |
| <i>Recipient Type:</i> Institution<br><i>Grant / Contract Purpose:</i> Research                                                |                  |                  |
| Laronde                                                                                                                        | Consultant       | Self             |
| <i>Category:</i> Consultant<br><i>Description:</i><br><i>Additional Information:</i>                                           |                  |                  |
| Legend Biotech                                                                                                                 | Grant / Contract | Self             |
| <i>Recipient Name:</i> Dan Barouch<br><i>Grant / Contract Description:</i> contract research<br><i>Additional Information:</i> |                  |                  |
| <i>Recipient Type:</i> Institution<br><i>Grant / Contract Purpose:</i> Research                                                |                  |                  |
| Massachusetts Consortium on Pathogen Readiness (MassCPR)                                                                       | Grant / Contract | Self             |
| <i>Recipient Name:</i> Dan Barouch<br><i>Grant / Contract Description:</i> academic research<br><i>Additional Information:</i> |                  |                  |
| <i>Recipient Type:</i> Institution<br><i>Grant / Contract Purpose:</i> Research                                                |                  |                  |
| Meissa                                                                                                                         | Consultant       | Self             |
| <i>Category:</i> Consultant<br><i>Description:</i><br><i>Additional Information:</i>                                           |                  |                  |
| MRC                                                                                                                            | Grant / Contract | Self             |
| <i>Recipient Name:</i> Dan Barouch<br><i>Grant / Contract Description:</i> academic research<br><i>Additional Information:</i> |                  |                  |
| <i>Recipient Type:</i> Institution<br><i>Grant / Contract Purpose:</i> Research                                                |                  |                  |
| Musk Foundation                                                                                                                | Grant / Contract | Self             |
| <i>Recipient Name:</i> Dan Barouch<br><i>Grant / Contract Description:</i> academic research<br><i>Additional Information:</i> |                  |                  |
| <i>Recipient Type:</i> Institution<br><i>Grant / Contract Purpose:</i> Research                                                |                  |                  |
| NIH                                                                                                                            | Grant / Contract | Self             |
| <i>Recipient Name:</i> Dan Barouch<br><i>Grant / Contract Description:</i> academic research<br><i>Additional Information:</i> |                  |                  |
| <i>Recipient Type:</i> Institution<br><i>Grant / Contract Purpose:</i> Research                                                |                  |                  |
| Pfizer                                                                                                                         | Consultant       | Self             |

| Entity                                                                                                                          | Type             | Interest Held By |
|---------------------------------------------------------------------------------------------------------------------------------|------------------|------------------|
| <i>Category:</i> Consultant<br><i>Description:</i> consultant<br><i>Additional Information:</i>                                 |                  |                  |
| Pharm-Olam                                                                                                                      | Grant / Contract | Self             |
| <i>Recipient Name:</i> Dan Barouch<br><i>Grant / Contract Description:</i><br><i>Additional Information:</i>                    |                  |                  |
| <i>Recipient Type:</i> Institution<br><i>Grant / Contract Purpose:</i> Research                                                 |                  |                  |
| Ragon Institute                                                                                                                 | Grant / Contract | Self             |
| <i>Recipient Name:</i> Dan Barouch<br><i>Grant / Contract Description:</i> academic research<br><i>Additional Information:</i>  |                  |                  |
| <i>Recipient Type:</i> Institution<br><i>Grant / Contract Purpose:</i> Research                                                 |                  |                  |
| Regeneron Pharmaceuticals                                                                                                       | Grant / Contract | Self             |
| <i>Recipient Name:</i> Dan Barouch<br><i>Grant / Contract Description:</i> manuscript support<br><i>Additional Information:</i> |                  |                  |
| <i>Recipient Type:</i> Institution<br><i>Grant / Contract Purpose:</i> Other - manuscript support                               |                  |                  |
| SANOFI PASTEUR INC.                                                                                                             | Grant / Contract | Self             |
| <i>Recipient Name:</i> Dan Barouch<br><i>Grant / Contract Description:</i> contract research<br><i>Additional Information:</i>  |                  |                  |
| <i>Recipient Type:</i> Institution<br><i>Grant / Contract Purpose:</i> Research                                                 |                  |                  |
| SQZ Biotech                                                                                                                     | Consultant       | Self             |
| <i>Category:</i> Consultant<br><i>Description:</i> consultant<br><i>Additional Information:</i>                                 |                  |                  |
| SterneKessler                                                                                                                   | Expert Witness   | Self             |
| <i>Category:</i> Expert Witness<br><i>Description:</i> Client: Takeda<br><i>Additional Information:</i>                         |                  |                  |
| Vector Sciences                                                                                                                 | Stock            | Self             |
| <i>Additional Information:</i>                                                                                                  |                  |                  |
| Zentaris                                                                                                                        | Grant / Contract | Self             |
| <i>Recipient Name:</i> Dan Barouch<br><i>Grant / Contract Description:</i> contract research<br><i>Additional Information:</i>  |                  |                  |
| <i>Recipient Type:</i> Institution<br><i>Grant / Contract Purpose:</i> Research                                                 |                  |                  |

## Intellectual Property

| Type                                                       | Is Licensed | Interest Held By |
|------------------------------------------------------------|-------------|------------------|
| Patent - COMPOSITIONS AND METHODS FOR TREATING CORONAVIRUS | -           | Self             |

| Type                                                                                                                                                                                      | Is Licensed | Interest Held By |
|-------------------------------------------------------------------------------------------------------------------------------------------------------------------------------------------|-------------|------------------|
| <p><i>Description:</i> COMPOSITIONS AND METHODS FOR TREATING CORONAVIRUS INFECTION<br/> <i>Patent Status:</i> Provisional<br/> <i>Filing Jurisdiction:</i> USA<br/> <i>Licensees:</i></p> |             |                  |
| <p><i>Patent Number:</i> 3,101,131<br/> <i>Patent Holder:</i> Current Institution</p>                                                                                                     |             |                  |
| Licensee                                                                                                                                                                                  | Title       | Date             |
| Janssen Research and Development                                                                                                                                                          |             |                  |
| <i>Additional Information:</i>                                                                                                                                                            |             |                  |
| Patent - COMPOSITIONS AND METHODS FOR TREATING CORONAVIRUS                                                                                                                                | -           | Self             |
| <p><i>Description:</i> COMPOSITIONS AND METHODS FOR TREATING CORONAVIRUS INFECTION<br/> <i>Patent Status:</i> Provisional<br/> <i>Filing Jurisdiction:</i> USA<br/> <i>Licensees:</i></p> |             |                  |
| <p><i>Patent Number:</i> 63/135,182<br/> <i>Patent Holder:</i> Current Institution</p>                                                                                                    |             |                  |
| Licensee                                                                                                                                                                                  | Title       | Date             |
| Janssen Research and Development                                                                                                                                                          |             |                  |
| <i>Additional Information:</i>                                                                                                                                                            |             |                  |
| Patent - COMPOSITIONS AND METHODS FOR TREATING CORONAVIRUS                                                                                                                                | -           | Self             |
| <p><i>Description:</i> COMPOSITIONS AND METHODS FOR TREATING CORONAVIRUS INFECTION<br/> <i>Patent Status:</i> Provisional<br/> <i>Filing Jurisdiction:</i> USA<br/> <i>Licensees:</i></p> |             |                  |
| <p><i>Patent Number:</i> 63/133,969<br/> <i>Patent Holder:</i> Current Institution</p>                                                                                                    |             |                  |
| Licensee                                                                                                                                                                                  | Title       | Date             |
| Janssen Research and Development                                                                                                                                                          |             |                  |
| <i>Additional Information:</i>                                                                                                                                                            |             |                  |
| Patent - COMPOSITIONS AND METHODS FOR TREATING CORONAVIRUS                                                                                                                                | -           | Self             |
| <p><i>Description:</i> COMPOSITIONS AND METHODS FOR TREATING CORONAVIRUS INFECTION<br/> <i>Patent Status:</i> Provisional<br/> <i>Filing Jurisdiction:</i> USA<br/> <i>Licensees:</i></p> |             |                  |
| <p><i>Patent Number:</i> 63/121,482<br/> <i>Patent Holder:</i> Current Institution</p>                                                                                                    |             |                  |
| Licensee                                                                                                                                                                                  | Title       | Date             |
| Janssen Research and Development                                                                                                                                                          |             |                  |
| <i>Additional Information:</i>                                                                                                                                                            |             |                  |

## Additional Questions

1. Are there other relationships or activities that readers could perceive to have influenced, or that give the appearance of potentially influencing, what you wrote in the submitted work?

No.

2. What is the manuscript title?

**3. Are you the corresponding author?**

Yes.

**a. Please list the other authors' names here.**

Ai-ris Y. Collier, M.D., Jessica Miller, B.S., Nicole P. Hachmann, B.S., Katherine McMahan, M.S., Jinyan Liu, Ph.D., Esther Apraku Bondzie, M.S.N., Lydia Gallup, R.N., Marjorie Rowe, B.S., Eleanor Schonberg, B.A., Siline Thai, B.S., Julia Barrett, B.S., Erica N. Borducchi, Ph.D., Emily Bouffard, B.S., Catherine Jacob-Dolan, B.S., Camille R. Mazurek, M.S., Audrey Mutoni, B.A., Olivia Powers, B.S., Michaela Sciacca, B.S., Nehalee Surve, M.S., Haley VanWyk, B.S., Cindy Wu, B.S., and Dan H. Barouch, M.D., Ph.D.\*

## Certification

I certify that the information provided in this disclosure is complete and accurate.

Julia Barrett

Discloser Identifier: 1007993

Disclosure Purpose: 222-13948

## Summary of Interests

I do not have any interests to disclose at this time.

## Additional Questions

1. **Are there other relationships or activities that readers could perceive to have influenced, or that give the appearance of potentially influencing, what you wrote in the submitted work?**

No.

2. **What is the manuscript title?**

Immunogenicity of the BA.5 Bivalent mRNA Vaccine Boosters

3. **Are you the corresponding author?**

No.

## Certification

I certify that the information provided in this disclosure is complete and accurate.

Erica Borducchi

**Discloser Identifier:** 805264

**Disclosure Purpose:** 222-13948

## Summary of Interests

I do not have any interests to disclose at this time.

## Additional Questions

1. **Are there other relationships or activities that readers could perceive to have influenced, or that give the appearance of potentially influencing, what you wrote in the submitted work?**

No.

2. **What is the manuscript title?**

Immunogenicity of the BA.5 Bivalent mRNA Vaccine Boosters

3. **Are you the corresponding author?**

No.

## Certification

I certify that the information provided in this disclosure is complete and accurate.



**Discloser Identifier:** 1100726

**Disclosure Purpose:** 222-13948

## Summary of Interests

I do not have any interests to disclose at this time.

## Additional Questions

1. **Are there other relationships or activities that readers could perceive to have influenced, or that give the appearance of potentially influencing, what you wrote in the submitted work?**

No.

2. **What is the manuscript title?**

Immunogenicity of the BA.5 Bivalent mRNA Vaccine Boosters

3. **Are you the corresponding author?**

No.

## Certification

I certify that the information provided in this disclosure is complete and accurate.

Ai-ris Collier

Discloser Identifier: 908512

Disclosure Purpose: 222-13948

## Summary of Interests

### Company or Organization

| Entity                                                                                                                                   | Type             | Interest Held By                                                                |
|------------------------------------------------------------------------------------------------------------------------------------------|------------------|---------------------------------------------------------------------------------|
| National Institute of Allergy and Infectious Diseases                                                                                    | Grant / Contract | Self                                                                            |
| <i>Recipient Name:</i> Ai-ris Yonekura Collier, MD<br><i>Grant / Contract Description:</i> R21AI169309<br><i>Additional Information:</i> |                  | <i>Recipient Type:</i> Institution<br><i>Grant / Contract Purpose:</i> Research |

## Additional Questions

1. Are there other relationships or activities that readers could perceive to have influenced, or that give the appearance of potentially influencing, what you wrote in the submitted work?

No.

2. What is the manuscript title?

Immunogenicity of the BA.5 Bivalent mRNA Vaccine Boosters

3. Are you the corresponding author?

No.

## Certification

I certify that the information provided in this disclosure is complete and accurate.

**Discloser Identifier:** 1100723

**Disclosure Purpose:** 222-13948

## Summary of Interests

I do not have any interests to disclose at this time.

## Additional Questions

**1. Are there other relationships or activities that readers could perceive to have influenced, or that give the appearance of potentially influencing, what you wrote in the submitted work?**

No.

**2. What is the manuscript title?**

Immunogenicity of the BA.5 Bivalent mRNA Vaccine Boosters

**3. Are you the corresponding author?**

No.

## Certification

I certify that the information provided in this disclosure is complete and accurate.

Nicole Hachmann

**Discloser Identifier:** 1061019

**Disclosure Purpose:** 222-13948

## Summary of Interests

I do not have any interests to disclose at this time.

## Additional Questions

**1. Are there other relationships or activities that readers could perceive to have influenced, or that give the appearance of potentially influencing, what you wrote in the submitted work?**

No.

**2. What is the manuscript title?**

Immunogenicity of the BA.5 Bivalent mRNA Vaccine Boosters

**3. Are you the corresponding author?**

No.

## Certification

I certify that the information provided in this disclosure is complete and accurate.

Catherine Jacob-Dolan

**Discloser Identifier:** 1007999

**Disclosure Purpose:** 222-13948

## Summary of Interests

I do not have any interests to disclose at this time.

## Additional Questions

**1. Are there other relationships or activities that readers could perceive to have influenced, or that give the appearance of potentially influencing, what you wrote in the submitted work?**

No.

**2. What is the manuscript title?**

Immunogenicity of the BA.5 Bivalent mRNA Vaccine Boosters

**3. Are you the corresponding author?**

No.

## Certification

I certify that the information provided in this disclosure is complete and accurate.

**Discloser Identifier:** 955367

**Disclosure Purpose:** 222-13948

## Summary of Interests

I do not have any interests to disclose at this time.

## Additional Questions

**1. Are there other relationships or activities that readers could perceive to have influenced, or that give the appearance of potentially influencing, what you wrote in the submitted work?**

No.

**2. What is the manuscript title?**

Immunogenicity of the BA.5 Bivalent mRNA Vaccine Boosters

**3. Are you the corresponding author?**

No.

## Certification

I certify that the information provided in this disclosure is complete and accurate.

**Discloser Identifier:** 1100727

**Disclosure Purpose:** 222-13948

## Summary of Interests

I do not have any interests to disclose at this time.

## Additional Questions

**1. Are there other relationships or activities that readers could perceive to have influenced, or that give the appearance of potentially influencing, what you wrote in the submitted work?**

No.

**2. What is the manuscript title?**

Immunogenicity of the BA.5 Bivalent mRNA Vaccine Boosters

**3. Are you the corresponding author?**

No.

## Certification

I certify that the information provided in this disclosure is complete and accurate.

Katherine McMahan

**Discloser Identifier:** 1007987

**Disclosure Purpose:** 222-13948

## Summary of Interests

I do not have any interests to disclose at this time.

## Additional Questions

**1. Are there other relationships or activities that readers could perceive to have influenced, or that give the appearance of potentially influencing, what you wrote in the submitted work?**

No.

**2. What is the manuscript title?**

Immunogenicity of the BA.5 Bivalent mRNA Vaccine Boosters

**3. Are you the corresponding author?**

No.

## Certification

I certify that the information provided in this disclosure is complete and accurate.



Jessica Miller

**Discloser Identifier:** 1061020

**Disclosure Purpose:** 222-13948

## Summary of Interests

I do not have any interests to disclose at this time.

## Additional Questions

1. **Are there other relationships or activities that readers could perceive to have influenced, or that give the appearance of potentially influencing, what you wrote in the submitted work?**

No.

2. **What is the manuscript title?**

Immunogenicity of the BA.5 Bivalent mRNA Vaccine Boosters

3. **Are you the corresponding author?**

No.

## Certification

I certify that the information provided in this disclosure is complete and accurate.

Audrey Mutoni

**Discloser Identifier:** 1100728

**Disclosure Purpose:** 222-13948

## Summary of Interests

I do not have any interests to disclose at this time.

## Additional Questions

**1. Are there other relationships or activities that readers could perceive to have influenced, or that give the appearance of potentially influencing, what you wrote in the submitted work?**

No.

**2. What is the manuscript title?**

Immunogenicity of the BA.5 Bivalent mRNA Vaccine Boosters

**3. Are you the corresponding author?**

No.

## Certification

I certify that the information provided in this disclosure is complete and accurate.

**Discloser Identifier:** 1046560

**Disclosure Purpose:** 222-13948

## Summary of Interests

I do not have any interests to disclose at this time.

## Additional Questions

**1. Are there other relationships or activities that readers could perceive to have influenced, or that give the appearance of potentially influencing, what you wrote in the submitted work?**

No.

**2. What is the manuscript title?**

Immunogenicity of the BA.5 Bivalent mRNA Vaccine Boosters

**3. Are you the corresponding author?**

No.

## Certification

I certify that the information provided in this disclosure is complete and accurate.

Marjorie Rowe

Discloser Identifier: 1046555

Disclosure Purpose: 222-13948

## Summary of Interests

I do not have any interests to disclose at this time.

## Additional Questions

1. **Are there other relationships or activities that readers could perceive to have influenced, or that give the appearance of potentially influencing, what you wrote in the submitted work?**

No.

2. **What is the manuscript title?**

Immunogenicity of the BA.5 Bivalent mRNA Vaccine Boosters

3. **Are you the corresponding author?**

No.

## Certification

I certify that the information provided in this disclosure is complete and accurate.

**Discloser Identifier:** 1100724

**Disclosure Purpose:** 222-13948

## Summary of Interests

I do not have any interests to disclose at this time.

## Additional Questions

1. **Are there other relationships or activities that readers could perceive to have influenced, or that give the appearance of potentially influencing, what you wrote in the submitted work?**

No.

2. **What is the manuscript title?**

Immunogenicity of the BA.5 Bivalent mRNA Vaccine Boosters

3. **Are you the corresponding author?**

No.

## Certification

I certify that the information provided in this disclosure is complete and accurate.

Michaela Sciacca

Discloser Identifier: 1061022

Disclosure Purpose: 222-13948

## Summary of Interests

I do not have any interests to disclose at this time.

## Additional Questions

**1. Are there other relationships or activities that readers could perceive to have influenced, or that give the appearance of potentially influencing, what you wrote in the submitted work?**

No.

**2. What is the manuscript title?**

Immunogenicity of the BA.5 Bivalent mRNA Vaccine Boosters

**3. Are you the corresponding author?**

No.

## Certification

I certify that the information provided in this disclosure is complete and accurate.

Nehalee Surve

**Discloser Identifier:** 1061023

**Disclosure Purpose:** 222-13948

## Summary of Interests

I do not have any interests to disclose at this time.

## Additional Questions

**1. Are there other relationships or activities that readers could perceive to have influenced, or that give the appearance of potentially influencing, what you wrote in the submitted work?**

No.

**2. What is the manuscript title?**

Immunogenicity of the BA.5 Bivalent mRNA Vaccine Boosters

**3. Are you the corresponding author?**

No.

## Certification

I certify that the information provided in this disclosure is complete and accurate.

**Discloser Identifier:** 1100725

**Disclosure Purpose:** 222-13948

## Summary of Interests

I do not have any interests to disclose at this time.

## Additional Questions

**1. Are there other relationships or activities that readers could perceive to have influenced, or that give the appearance of potentially influencing, what you wrote in the submitted work?**

No.

**2. What is the manuscript title?**

Immunogenicity of the BA.5 Bivalent mRNA Vaccine Boosters

**3. Are you the corresponding author?**

No.

## Certification

I certify that the information provided in this disclosure is complete and accurate.



**Discloser Identifier:** 1046558

**Disclosure Purpose:** 222-13948

## Summary of Interests

I do not have any interests to disclose at this time.

## Additional Questions

1. **Are there other relationships or activities that readers could perceive to have influenced, or that give the appearance of potentially influencing, what you wrote in the submitted work?**

No.

2. **What is the manuscript title?**

Immunogenicity of the BA.5 Bivalent mRNA Vaccine Boosters

3. **Are you the corresponding author?**

No.

## Certification

I certify that the information provided in this disclosure is complete and accurate.

**Discloser Identifier:** 1056075

**Disclosure Purpose:** 222-13948

## Summary of Interests

I do not have any interests to disclose at this time.

## Additional Questions

1. **Are there other relationships or activities that readers could perceive to have influenced, or that give the appearance of potentially influencing, what you wrote in the submitted work?**

No.

2. **What is the manuscript title?**

Immunogenicity of the BA.5 Bivalent mRNA Vaccine Boosters

3. **Are you the corresponding author?**

No.

## Certification

I certify that the information provided in this disclosure is complete and accurate.
